# Supplementary material
Source: PubMed Central journal article supplement (PMC3524371)
Supplement: NIHMS415427-supplement-ESI.pdf [file NIHMS415427-supplement-ESI.pdf]

## Supporting Information

# Compact Zwitterion-coated Iron Oxide Nanoparticles for *In Vitro* and *In Vivo* Imaging

He Wei, Oliver T. Bruns, Ou Chen, and Mounji G. Bawendi\*

Department of Chemistry, Massachusetts Institute of Technology, 77 Massachusetts Avenue,  
Cambridge, Massachusetts 02139, United States

E-mail: [mgb@mit.edu](mailto:mgb@mit.edu)

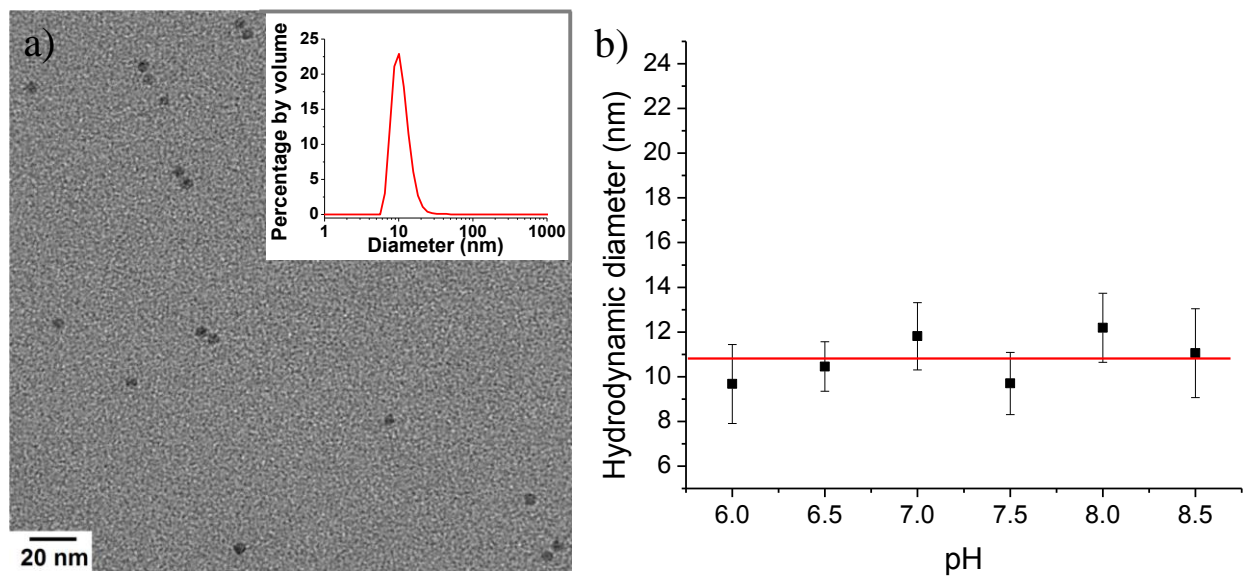

Figure S1. a) A TEM image of ZDS-NPs (inset: size distribution of ZDS-NPs at pH = 7.5) and b) hydrodynamic size of ZDS-NPs versus pH.

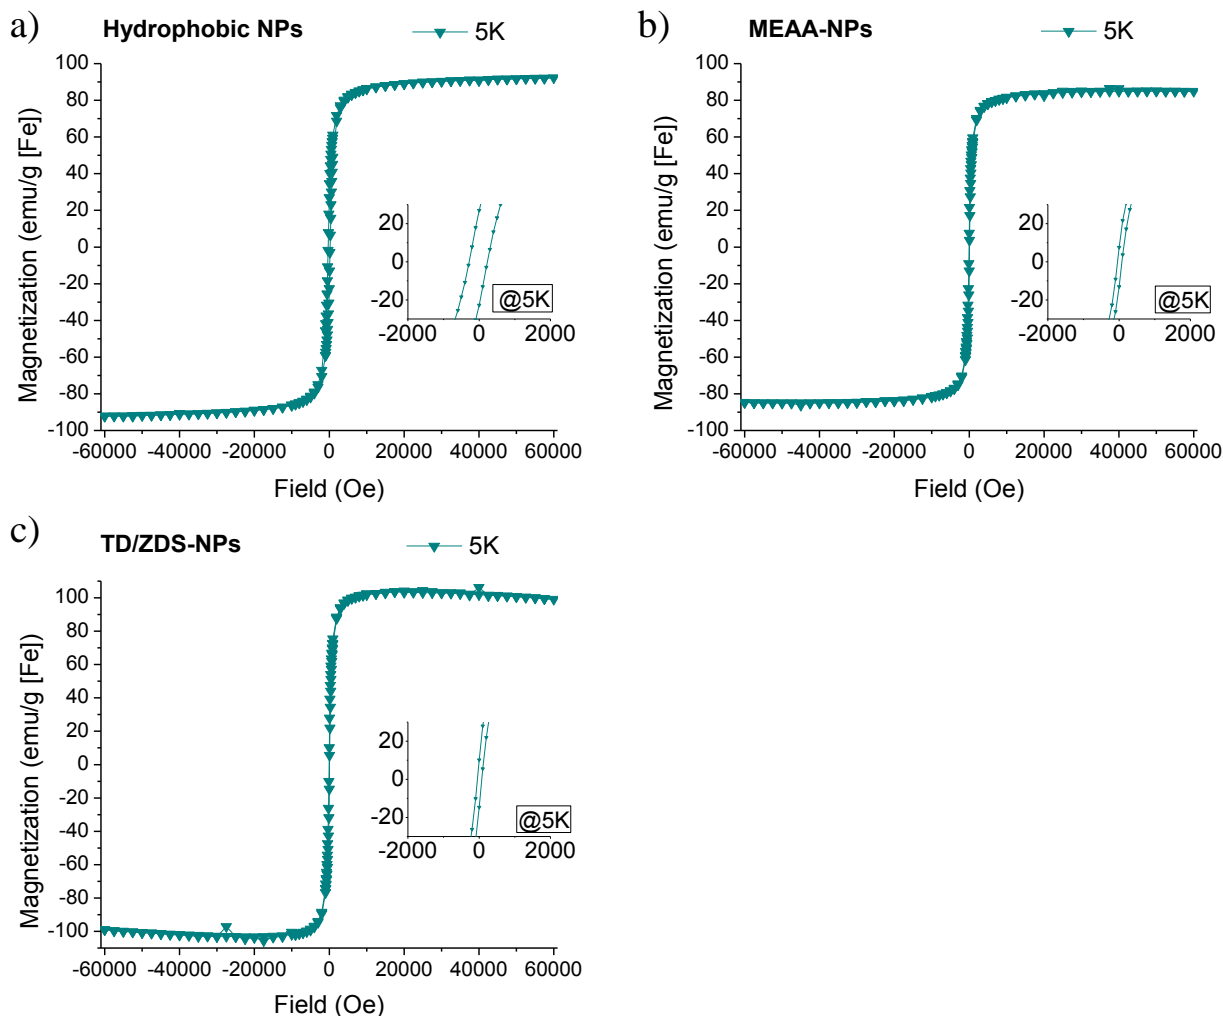

Figure S2. SQUID curves at 5K of a) hydrophobic NPs, b) MEAA-NPs, and c) TD/ZDS-NPs (inset: magnified SQUID curves near zero field).

The  $M_s$  of MEAA-NPs and TD/ZDS-NPs at room temperature were found to be  $\sim 63$  and  $\sim 74$  emu/g [Fe] (Figure 2b and c), respectively. These values are reasonably close to the  $M_s$  value of hydrophobic NPs ( $\sim 74$  emu/g [Fe]). The changes of magnetic coercivity among the insets of Figure S2a-c are presumably originated from the altered magnetic coupling between NPs, a possible result of different ligand coatings (i. e. spacing intervals) of NPs.<sup>1</sup>

1. Gross, A. F.; Diehl, M. R.; Beverly, K. C.; Richman, E. K.; Tolbert, S. H. *J. Phys. Chem. B* **2003**, *107*, 5475.
